# Supplementary material
Source: HighWire-hosted journal article supplement (http://www.annfammed.org/highwire/filestream/659/field_highwire_adjunct_files/0/Cohidon_Supp_Tables.pdf)
Supplement: Cohidon_Supp_Tables.pdf [file Cohidon_Supp_Tables.pdf]

## Supplemental materials for

Cohidon C, Wild P, Senn N. Practice organization characteristics related to job satisfaction among general practitioners in 11 countries. *Ann Fam Med.* 2019;17(6):510-517.

**Supplemental Table 1: Detailed description of the respondents in the 11 countries**

|                                                  | <b>AU<br/>747</b> | <b>CA<br/>2284</b> | <b>FR<br/>502</b> | <b>DE<br/>559</b> | <b>NL<br/>618</b> | <b>NZ<br/>503</b> | <b>NO<br/>864</b> | <b>SE<br/>2905</b> | <b>CH<br/>106<br/>5</b> | <b>UK<br/>1001</b> | <b>US<br/>1001</b> |
|--------------------------------------------------|-------------------|--------------------|-------------------|-------------------|-------------------|-------------------|-------------------|--------------------|-------------------------|--------------------|--------------------|
| <b>Sex Female (%)</b>                            | 37.0              | 43.8               | 35.0              | 44.3              | 45.3              | 45.0              | 40.0              | 51.5               | 32.9                    | 49.1               | 39.9               |
| <b>Age (%)</b>                                   |                   |                    |                   |                   |                   |                   |                   |                    |                         |                    |                    |
| <35                                              | 11.3              | 9.5                | 7.8               | 1.0               | 4.5               | 9.0               | 13.1              | 9.1                | 0.8                     | 13.8               | 5.5                |
| 35-44                                            | 28.8              | 22.1               | 15.8              | 35.7              | 28.1              | 29.0              | 31.7              | 26.6               | 18.1                    | 30.9               | 20.3               |
| 45-54                                            | 32.1              | 27.5               | 28.1              | 27.6              | 31.3              | 40.0              | 22.0              | 24.3               | 31.3                    | 30.0               | 30.1               |
| 55-64                                            | 17.3              | 26.3               | 39.0              | 28.6              | 33.3              | 18.0              | 27.0              | 28.1               | 36.4                    | 19.2               | 28.8               |
| >=65                                             | 10.5              | 14.5               | 9.3               | 7.1               | 2.7               | 4.0               | 6.2               | 11.8               | 13.5                    | 6.2                | 16.1               |
| <b>Urban area (%)</b>                            | 71.8              | 66.7               | 70.4              | 52.9              | 46.6              | 69.7              | 37.7              | 52.4               | 51.5                    | 68.0               | 72.1               |
| <b>Weekly workload (hours)</b>                   |                   |                    |                   |                   |                   |                   |                   |                    |                         |                    |                    |
| <40                                              | 65.3              | 54.5               | 26.6              | 35.6              | 44.2              | 69.2              | 59.2              | 67.1               | 35.5                    | 48.4               | 42.4               |
| 41-50                                            | 25.7              | 25.5               | 30.0              | 31.6              | 29.9              | 19.2              | 36.7              | 28.5               | 31.9                    | 30.6               | 26.4               |
| >50                                              | 8.9               | 19.9               | 43.4              | 32.8              | 25.9              | 11.5              | 11.1              | 4.4                | 32.6                    | 21.0               | 31.2               |
| <b>Administrative tasks (% of activities)</b>    |                   |                    |                   |                   |                   |                   |                   |                    |                         |                    |                    |
| <=10                                             | 66.3              | 48.5               | 45.4              | 24.0              | 16.0              | 31.4              | 31.5              | 17.2               | 25.2                    | 38.5               | 51.4               |
| 11-20                                            | 26.2              | 31.3               | 38.3              | 34.7              | 40.4              | 34.8              | 38.7              | 31.1               | 46.6                    | 31.0               | 21.5               |
| >20                                              | 7.5               | 20.1               | 16.3              | 41.3              | 43.6              | 33.8              | 29.8              | 51.7               | 28.2                    | 30.4               | 27.1               |
| <b>GPs FTE in the practice (median)</b>          |                   |                    |                   |                   |                   |                   |                   |                    |                         |                    |                    |
| 1                                                | 7.8               | 21.2               | 61.9              | 48.6              | 18.4              | 8.3               | 2.9               | 10.9               | 44.4                    | 3.8                | 28.3               |
| 2                                                | 12.9              | 16.1               | 27.0              | 33.8              | 47.4              | 14.4              | 11.5              | 12.4               | 31.9                    | 11.5               | 14.6               |
| 3-5                                              | 38.7              | 29.7               | 10.7              | 16.5              | 30.2              | 45.6              | 60.1              | 38.1               | 17.0                    | 48.9               | 26.7               |
| 6-10                                             | 33.3              | 20.4               | 0.2               | 1.2               | 3.0               | 28.7              | 23.4              | 29.7               | 3.4                     | 32.7               | 14.7               |
| >10                                              | 7.4               | 12.5               | 0.2               | 0.0               | 1.0               | 2.9               | 2.1               | 8.9                | 3.2                     | 3.1                | 15.8               |
| <b>Same-day appointment (%)</b>                  |                   |                    |                   |                   |                   |                   |                   |                    |                         |                    |                    |
| >50                                              | 73.6              | 55.3               | 79.1              | 85.7              | 82.0              | 84.6              | 72.4              | 45.7               | 85.8                    | 71.2               | 76.7               |
| 40-50                                            | 14.1              | 16.4               | 9.1               | 5.8               | 11.7              | 8.9               | 11.9              | 17.8               | 7.9                     | 18.8               | 11.3               |
| 20-40                                            | 5.6               | 15.2               | 4.6               | 5.6               | 5.1               | 4.0               | 11.3              | 18.9               | 4.5                     | 6.4                | 6.3                |
| <20                                              | 6.7               | 13.1               | 7.2               | 2.9               | 1.2               | 2.5               | 4.4               | 17.6               | 1.7                     | 3.6                | 5.7                |
| <b>Offering home visit (%)</b>                   | 25.1              | 19.5               | 56.1              | 57.1              | 88.3              | 20.6              | 20.3              | 24.7               | 42.8                    | 84.0               | 6.0                |
| <b>Information on clinical targets (%)</b>       | 34.9              | 23.0               | 46.6              | 44.3              | 90.2              | 65.1              | 32.0              | 80.2               | 8.7                     | 86.2               | 52.8               |
| <b>Inter-consultation patient contacts (%)</b>   | 89.0              | 82.2               | 81.1              | 81.1              | 87.3              | 96.4              | 88.0              | 90.0               | 82.7                    | 92.5               | 88.8               |
| <b>Patient satisfaction surveys (%)</b>          | 46.3              | 17.1               | 3.7               | 25.1              | 62.8              | 60.5              | 9.3               | 89.2               | 15.7                    | 87.9               | 64.1               |
| <b>Information about hospital admissions (%)</b> | 32.0              | 33.0               | 22.7              | 22.5              | 30.7              | 47.2              | 33.6              | 25.9               | 30.3                    | 85.8               | 58.9               |
| <b>Preventive care targets (%)</b>               | 41.8              | 37.4               | 30.7              | 11.6              | 42.6              | 88.0              | 6.1               | 10.3               | 7.2                     | 82.6               | 57.8               |
| <b>Performance comparisons (%)</b>               | 47.5              | 41.8               | 65.5              | 40.5              | 48.2              | 83.8              | 22.7              | 53.0               | 33.5                    | 83.4               | 74.9               |
| <b>Coordinated care with social workers (%)</b>  |                   |                    |                   |                   |                   |                   |                   |                    |                         |                    |                    |
| Yes                                              | 45.0              | 50.2               | 35.3              | 63.5              | 42.5              | 58.9              | 51.7              | 41.9               | 60.6                    | 65.6               | 43.8               |
| Occasionally                                     | 48.8              | 42.9               | 54.2              | 29.8              | 48.8              | 39.2              | 44.4              | 51.2               | 36.1                    | 32.3               | 37.2               |

|                                                     |      |      |      |      |      |      |      |      |      |      |      |
|-----------------------------------------------------|------|------|------|------|------|------|------|------|------|------|------|
| Never                                               | 6.3  | 6.9  | 10.5 | 6.7  | 8.7  | 1.9  | 3.9  | 6.9  | 3.3  | 2.1  | 9.0  |
| <b>Contacts with home care providers (%)</b>        |      |      |      |      |      |      |      |      |      |      |      |
| Yes                                                 | 29.2 | 32.4 | 36.5 | 51.0 | 56.2 | 28.0 | 63.0 | 53.4 | 55.7 | 34.0 | 53.0 |
| Occasionally                                        | 67.1 | 62.1 | 57.7 | 47.4 | 43.5 | 67.0 | 36.7 | 43.9 | 43.4 | 62.0 | 44.2 |
| Never                                               | 3.7  | 5.4  | 5.8  | 1.6  | 0.3  | 5.0  | 0.4  | 2.6  | 0.9  | 4.0  | 2.8  |
| <b>Working with a case manager (%)</b>              |      |      |      |      |      |      |      |      |      |      |      |
| Yes, in-practice                                    | 75.4 | 42.9 | 12.9 | 20.6 | 83.0 | 83.0 | 31.8 | 75.8 | 8.4  | 87.4 | 43.9 |
| Yes, external                                       | 6.2  | 21.5 | 83.3 | 6.8  | 14.9 | 7.4  | 33.9 | 9.8  | 52.2 | 8.3  | 22.8 |
| No                                                  | 18.4 | 35.6 | 3.8  | 72.2 | 2.1  | 9.6  | 34.3 | 14.4 | 39.3 | 4.3  | 33.3 |
| <b>Information on changes in patient health (%)</b> |      |      |      |      |      |      |      |      |      |      |      |
| Yes                                                 | 43.3 | 48.8 | 42.9 | 65.5 | 61.4 | 40.1 | 53.4 | 50.7 | 73.1 | 47.5 | 64.1 |
| Occasionally                                        | 52.5 | 46.9 | 50.7 | 33.4 | 38.0 | 56.6 | 45.5 | 46.1 | 26.3 | 50.0 | 33.4 |
| Never                                               | 4.1  | 4.3  | 6.4  | 1.1  | 0.6  | 3.3  | 1.1  | 3.2  | 0.6  | 2.5  | 2.5  |
| <b>Delayed discharge (%)</b>                        |      |      |      |      |      |      |      |      |      |      |      |
| < 2 days                                            | 32.4 | 22.5 | 14.9 | 70.4 | 43.3 | 62.3 | 22.5 | 19.7 | 40.0 | 33.7 | 53.1 |
| 2 days-2 weeks                                      | 56.6 | 55.4 | 50.8 | 23.0 | 50.2 | 35.3 | 73.2 | 67.6 | 50.1 | 57.7 | 38.3 |
| 3-4 weeks                                           | 7.8  | 12.7 | 25.1 | 4.5  | 5.8  | 2.4  | 4.1  | 7.7  | 6.9  | 7.1  | 2.8  |
| > 1 month /never                                    | 3.2  | 9.4  | 9.2  | 2.1  | 0.7  | 0.0  | 0.2  | 5.1  | 3.0  | 1.5  | 5.8  |
| <b>Coordinated care with hospital (%)</b>           | 82.2 | 79.8 | 89.6 | 92.2 | 92.2 | 87.3 | 83.3 | 81.2 | 87.5 | 95.0 | 88.7 |
| <b>Electronic Health Record (%)</b>                 | 92.4 | 72.9 | 75.6 | 85.5 | 99.3 | 99.8 | 99.5 | 99.3 | 54.3 | 98.4 | 84.5 |
| <b>Electronic drug alert (%)</b>                    |      |      |      |      |      |      |      |      |      |      |      |
| Yes                                                 | 89.5 | 41.7 | 46.8 | 31.5 | 96.4 | 94.8 | 82.3 | 81.6 | 29.8 | 86.5 | 77.3 |
| Occasionally                                        | 4.9  | 14.3 | 20.0 | 16.6 | 2.8  | 4.0  | 10.6 | 11.4 | 15.2 | 11.8 | 6.6  |
| Never                                               | 5.6  | 44.0 | 33.2 | 52.2 | 0.8  | 1.2  | 7.1  | 7.0  | 55.0 | 1.7  | 16.0 |

AU = Australia; CA = Canada; CH = Switzerland; DE = Germany; FR = France; NL = Netherlands; NO = Norway; NZ = New Zealand; SE = Sweden; UK = United Kingdom; US = United States.

FTE: GPs Full-time equivalent in the practice. Urbanity was self-reported.

**Supplemental Table 2: Multivariate analysis of associations between dissatisfaction and practices characteristics in each country (Odds ratio and confidence interval)**

|                                               | <b>AU<br/>747</b>   | <b>CA<br/>2284</b>  | <b>FR<br/>502</b>    | <b>DE<br/>559</b>   | <b>NL<br/>618</b>    | <b>NZ<br/>503</b>    | <b>NO<br/>864</b>   | <b>SE<br/>2905</b>  | <b>CH<br/>1065</b>  | <b>UK<br/>1001</b>   | <b>US<br/>1001</b>  |
|-----------------------------------------------|---------------------|---------------------|----------------------|---------------------|----------------------|----------------------|---------------------|---------------------|---------------------|----------------------|---------------------|
| <b>Sex – ref Male</b>                         |                     |                     |                      |                     |                      |                      |                     |                     |                     |                      |                     |
| Female                                        | 1.0<br>[0.67-1.51]  | 1.01<br>[0.79-1.30] | 1.00<br>[0.57-1.75]  | 1.77<br>[1.12-2.82] | 1.29<br>[0.80-2.07]  | 1.10<br>[0.72-1.67]  | 0.52<br>[0.27-0.73] | 1.20<br>[1.01-1.43] | 1.11<br>[0.77-1.61] | 1.03<br>[0.75-1.41]  | 1.00<br>[0.73-1.38] |
| <b>Age- ref &lt;35 yrs.</b>                   |                     |                     |                      |                     |                      |                      |                     |                     |                     |                      |                     |
| 35-44                                         | 1.18<br>[0.67-2.09] | 0.92<br>[0.65-1.29] | 0.62<br>[0.24-1.57]  | 0.35<br>[0.07-1.74] | 1.51<br>[0.72-3.16]  | 1.10<br>[0.55-2.18]  | 0.96<br>[0.55-1.50] | 0.99<br>[0.72-1.37] | 1.36<br>[0.35-5.25] | 1.06<br>[0.66-1.72]  | 1.69<br>[0.87-3.29] |
| 45-54                                         | 0.95<br>[0.54-1.69] | 1.28<br>[0.89-1.85] | 0.94<br>[0.39-2.30]  | 0.37<br>[0.07-1.86] | 1.94<br>[0.90-4.16]  | 1.61<br>[0.84-3.07]  | 1.25<br>[0.72-2.18] | 1.28<br>[0.91-1.79] | 1.78<br>[0.46-6.85] | 1.51<br>[0.95-2.41]  | 1.82<br>[0.94-3.51] |
| 55-64                                         | 0.82<br>[0.44-1.54] | 1.35<br>[0.92-1.97] | 0.98<br>[0.40-2.38]  | 0.34<br>[0.07-1.73] | 1.90<br>[0.87-4.16]  | 1.20<br>[0.57-2.52]  | 0.94<br>[0.56-1.58] | 1.25<br>[0.89-1.76] | 1.79<br>[0.47-6.85] | 1.18<br>[0.72-1.92]  | 1.82<br>[0.91-3.64] |
| >=65                                          | 0.66<br>[0.22-2.01] | 0.50<br>[0.32-0.79] | 0.97<br>[0.25-3.70]  | 0.70<br>[0.13-3.87] | 2.82<br>[0.60-13.33] | 1.14<br>[0.34-3.84]  | 0.72<br>[0.35-1.49] | 0.54<br>[0.37-0.80] | 0.84<br>[0.21-3.44] | 0.72<br>[0.29-1.82]  | 1.22<br>[0.57-2.61] |
| <b>Area – ref Rural</b>                       |                     |                     |                      |                     |                      |                      |                     |                     |                     |                      |                     |
| Urban                                         | 0.95<br>[0.63-1.43] | 1.11<br>[0.87-1.42] | 1.64<br>[0.97-2.80]  | 0.70<br>[0.43-1.14] | 1.17<br>[0.76-1.81]  | 0.98<br>[0.60-1.58]  | 1.12<br>[0.80-1.58] | 1.16<br>[0.97-1.40] | 1.12<br>[0.84-1.50] | 1.23<br>[0.90-1.68]  | 1.10<br>[0.78-1.54] |
| <b>Weekly workload- ref &lt;=40 hours</b>     |                     |                     |                      |                     |                      |                      |                     |                     |                     |                      |                     |
| 41-50                                         | 1.18<br>[0.76-1.83] | 0.95<br>[0.72-1.24] | 2.22<br>[1.13-4.34]  | 1.85<br>[1.08-3.17] | 1.17<br>[0.67-2.02]  | 1.04<br>[0.65-1.65]  | 1.08<br>[0.77-1.50] | 1.25<br>[1.03-1.51] | 1.24<br>[0.85-1.82] | 0.88<br>[0.62-1.24]  | 1.12<br>[0.77-1.63] |
| >50                                           | 1.29<br>[0.59-2.84] | 1.37<br>[1.00-1.88] | 2.07<br>[1.00-4.24]  | 2.16<br>[1.26-3.70] | 1.62<br>[0.87-3.04]  | 0.86<br>[0.37-2.03]  | 1.07<br>[0.60-1.90] | 1.55<br>[0.91-2.63] | 1.27<br>[0.82-1.96] | 1.05<br>[0.70-1.56]  | 1.04<br>[0.71-1.53] |
| <b>% Admin task - ref &lt;=10%</b>            |                     |                     |                      |                     |                      |                      |                     |                     |                     |                      |                     |
| 11-20                                         | 1.00<br>[0.66-1.51] | 1.21<br>[0.94-1.57] | 1.73<br>[0.97-3.07]  | 1.53<br>[0.83-2.82] | 1.08<br>[0.60-1.96]  | 0.89<br>[0.53-1.50]  | 1.14<br>[0.79-1.65] | 0.96<br>[0.74-1.24] | 1.30<br>[0.90-1.88] | 0.95<br>[0.65-1.39]  | 1.47<br>[1.03-2.11] |
| >20                                           | 1.59<br>[0.74-3.45] | 1.40<br>[1.03-1.90] | 2.51<br>[1.10-5.71]  | 1.95<br>[1.02-3.72] | 2.05<br>[1.11-3.77]  | 1.45<br>[0.85-2.48]  | 2.17<br>[1.41-3.32] | 1.28<br>[0.99-1.64] | 1.58<br>[1.04-2.40] | 1.18<br>[0.82-1.71]  | 2.48<br>[1.70-3.71] |
| <b>GP FTE in the practice – ref =1</b>        |                     |                     |                      |                     |                      |                      |                     |                     |                     |                      |                     |
| 2                                             | 1.11<br>[0.42-2.88] | 0.94<br>[0.64-1.38] | 1.50<br>[0.86-2.61]  | 0.77<br>[0.44-1.35] | 1.05<br>[0.62-1.80]  | 1.81<br>[0.66-4.97]  | 1.54<br>[0.46-5.10] | 0.60<br>[0.41-0.85] | 0.89<br>[0.62-1.27] | 0.61<br>[0.25-1.51]  | 1.41<br>[0.85-2.36] |
| 3-5                                           | 0.92<br>[0.43-2.00] | 0.67<br>[0.47-0.95] | 0.86<br>[0.29-2.59]  | 0.75<br>[0.39-1.44] | 1.32<br>[0.73-2.39]  | 1.47<br>[0.60-3.61]  | 1.32<br>[0.44-3.96] | 0.61<br>[0.45-0.83] | 0.84<br>[0.55-1.29] | 0.45<br>[0.20-1.02]  | 1.30<br>[0.82-2.06] |
| 6-10                                          | 0.65<br>[0.30-1.42] | 0.70<br>[0.48-1.03] | 8.17<br>[1.49-44.85] | 1.00<br>[0.24-4.04] | 2.07<br>[0.41-10.4]  | 1.73<br>[0.68-4.36]  | 1.11<br>[0.37-3.37] | 0.47<br>[0.34-0.65] | 0.92<br>[0.44-1.92] | 0.45<br>[0.19-1.07]  | 1.02<br>[0.63-1.65] |
| >10                                           | 0.58<br>[0.21-1.63] | 0.79<br>[0.50-1.27] | -                    | -                   | 3.13<br>[1.19-8.20]  | 2.06<br>[0.50-8.57]  | 2.47<br>[0.68-9.01] | 0.50<br>[0.33-0.75] | 1.29<br>[0.57-2.91] | 0.59<br>[0.16-2.13]  | 1.07<br>[0.62-1.86] |
| <b>Consultation duration – ref &lt;10 min</b> |                     |                     |                      |                     |                      |                      |                     |                     |                     |                      |                     |
| 10-15                                         | 1.36<br>[0.80-2.30] | 0.96<br>[0.72-1.29] | 0.44<br>[0.16-1.24]  | 1.54<br>[0.88-2.67] | 1.33<br>[0.87-2.02]  | 1.34<br>[0.31-5.82]  | 0.46<br>[0.15-1.40] | 0.56<br>[0.29-1.12] | 0.94<br>[0.55-1.62] | 0.94<br>[0.63-1.41]  | 1.50<br>[0.89-2.53] |
| 15-20                                         | 0.89<br>[0.44-1.80] | 1.23<br>[0.86-1.76] | 0.44<br>[0.16-1.19]  | 0.25<br>[0.05-1.33] | 2.58<br>[0.62-10.71] | 1.15<br>[0.24-5.48]  | 0.45<br>[0.15-1.36] | 0.38<br>[0.20-0.71] | 0.99<br>[0.57-1.74] | 1.07<br>[0.10-11.37] | 1.27<br>[0.73-2.21] |
| >20                                           | 0.35<br>[0.11-1.10] | 1.83<br>[1.22-2.74] | 0.16<br>[0.05-0.47]  | 0.74<br>[0.06-9.41] | -                    | 1.75<br>[0.22-13.68] | 0.56<br>[0.17-1.83] | 0.32<br>[0.17-0.61] | 1.04<br>[0.57-1.90] | 0.10<br>[0.02-0.47]  | 1.07<br>[0.60-1.90] |
| <b>% same-day appointment– ref &gt;=60 %</b>  |                     |                     |                      |                     |                      |                      |                     |                     |                     |                      |                     |
| 40-50                                         | 0.67<br>[0.41-1.11] | 1.12<br>[0.83-1.51] | 1.87<br>[0.85-4.11]  | 2.68<br>[0.88-8.15] | 0.85<br>[0.42-1.71]  | 0.70<br>[0.31-1.57]  | 1.64<br>[0.99-2.73] | 1.63<br>[1.28-2.06] | 1.62<br>[0.94-2.78] | 0.96<br>[0.67-1.39]  | 1.19<br>[0.73-1.93] |
| 20-40                                         | 2.28                | 1.72                | 0.92                 | 1.42                | 0.83                 | 3.30                 | 1.26                | 1.56                | 1.23                | 0.84                 | 2.26                |

|                                                                  |                                    |                                    |                                    |                                     |                                    |                                    |                                    |                                    |                                    |                                    |                                    |
|------------------------------------------------------------------|------------------------------------|------------------------------------|------------------------------------|-------------------------------------|------------------------------------|------------------------------------|------------------------------------|------------------------------------|------------------------------------|------------------------------------|------------------------------------|
| <20                                                              | [0.82-6.36]<br>0.81<br>[0.35-1.87] | [1.28-2.32]<br>1.63<br>[1.12-2.39] | [0.34-2.48]<br>2.09<br>[0.62-6.97] | [0.44-4.56]<br>3.41<br>[0.85-13.70] | [0.35-1.97]<br>1.85<br>[0.50-6.80] | [1.39-7.81]<br>0.38<br>[0.07-2.02] | [0.76-2.07]<br>1.51<br>[0.63-3.60] | [1.24-1.97]<br>2.68<br>[2.03-3.55] | [0.73-2.06]<br>1.42<br>[0.55-3.67] | [0.41-1.70]<br>1.75<br>[0.71-4.29] | [1.24-4.13]<br>0.98<br>[0.42-2.28] |
| <b>Home visits – ref No</b>                                      |                                    |                                    |                                    |                                     |                                    |                                    |                                    |                                    |                                    |                                    |                                    |
| Yes                                                              | 0.86<br>[0.55-1.36]                | 0.88<br>[0.66-1.16]                | 0.61<br>[0.37-1.01]                | 0.38<br>[0.20-0.70]                 | 0.82<br>[0.46-1.49]                | 0.91<br>[0.55-1.49]                | 0.81<br>[0.55-1.18]                | 0.93<br>[0.76-1.14]                | 0.99<br>[0.74-1.34]                | 0.92<br>[0.60-1.41]                | 0.96<br>[0.52-1.80]                |
| <b>Information on clinical results targets – ref No</b>          |                                    |                                    |                                    |                                     |                                    |                                    |                                    |                                    |                                    |                                    |                                    |
| Yes                                                              | 1.02<br>[0.64-1.64]                | 0.73<br>[0.54-0.98]                | 1.08<br>[0.59-1.99]                | 1.70<br>[1.08-2.68]                 | 1.17<br>[0.51-2.66]                | 0.97<br>[0.58-1.61]                | 1.01<br>[0.70-1.44]                | 0.67<br>[0.53-0.85]                | 1.09<br>[0.59-2.05]                | 0.74<br>[0.47-1.16]                | 0.81<br>[0.52-1.25]                |
| <b>Inter-consultation patient contacts – ref No</b>              |                                    |                                    |                                    |                                     |                                    |                                    |                                    |                                    |                                    |                                    |                                    |
| Yes                                                              | 0.67<br>[0.35-1.30]                | 0.76<br>[0.55-1.07]                | 0.33<br>[0.16-0.70]                | 0.75<br>[0.32-1.75]                 | 1.06<br>[0.60-1.88]                | 0.56<br>[0.23-1.40]                | 1.87<br>[1.10-3.18]                | 0.73<br>[0.53-0.99]                | 0.89<br>[0.60-1.28]                | 1.14<br>[0.63-2.08]                | 0.72<br>[0.41-1.26]                |
| <b>Patient satisfaction surveys– ref No</b>                      |                                    |                                    |                                    |                                     |                                    |                                    |                                    |                                    |                                    |                                    |                                    |
| Yes                                                              | 1.12<br>[0.72-1.72]                | 0.85<br>[0.61-1.18]                | 7.60<br>[1.78-32.52]               | 0.66<br>[0.35-1.21]                 | 0.99<br>[0.63-1.57]                | 0.87<br>[0.56-1.36]                | 1.03<br>[0.58-1.83]                | 0.78<br>[0.57-1.06]                | 1.00<br>[0.66-1.51]                | 1.56<br>[0.94-2.58]                | 1.06<br>[0.71-1.58]                |
| <b>Information about hospital admissions– ref No</b>             |                                    |                                    |                                    |                                     |                                    |                                    |                                    |                                    |                                    |                                    |                                    |
| Yes                                                              | 1.17<br>[0.78-1.78]                | 0.86<br>[0.64-1.12]                | 0.70<br>[0.37-1.34]                | 0.59<br>[0.31-1.13]                 | 0.90<br>[0.57-1.42]                | 1.37<br>[0.89-2.11]                | 1.01<br>[0.70-1.45]                | 0.83<br>[0.67-1.02]                | 1.02<br>[0.73-1.43]                | 0.95<br>[0.60-1.50]                | 0.81<br>[0.55-1.19]                |
| <b>Preventive care target – ref No</b>                           |                                    |                                    |                                    |                                     |                                    |                                    |                                    |                                    |                                    |                                    |                                    |
| Yes                                                              | 0.95<br>[0.61-1.49]                | 1.07<br>[0.80-1.43]                | 0.99<br>[0.54-1.80]                | 0.64<br>[0.21-1.43]                 | 0.93<br>[0.60-1.46]                | 0.96<br>[0.48-1.92]                | 1.13<br>[0.53-2.40]                | 1.53<br>[1.11-2.13]                | 0.51<br>[0.27-0.95]                | 0.88<br>[0.59-1.56]                | 0.83<br>[0.52-1.32]                |
| <b>Performance comparisons– ref No</b>                           |                                    |                                    |                                    |                                     |                                    |                                    |                                    |                                    |                                    |                                    |                                    |
| Yes                                                              | 1.29<br>[0.87-1.91]                | 1.02<br>[0.79-1.33]                | 1.19<br>[0.63-2.26]                | 1.12<br>[0.70-1.79]                 | 0.75<br>[0.48-1.15]                | 0.66<br>[0.34-1.27]                | 1.26<br>[0.82-1.94]                | 0.93<br>[0.78-1.12]                | 0.96<br>[0.70-1.32]                | 0.72<br>[0.50-1.05]                | 1.78<br>[1.13-2.78]                |
| <b>Involved in coordinated care with social workers - ref No</b> |                                    |                                    |                                    |                                     |                                    |                                    |                                    |                                    |                                    |                                    |                                    |
| Occasionally                                                     | 1.37<br>[0.47-4.00]                | 1.31<br>[0.74-2.30]                | 0.86<br>[0.30-2.46]                | 0.56<br>[1.14-2.21]                 | 0.98<br>[0.45-2.11]                | 0.55<br>[0.18-1.65]                | 0.63<br>[0.32-1.25]                | 1.12<br>[0.74-1.70]                | 0.89<br>[0.23-3.39]                | 1.27<br>[0.65-2.50]                | 0.80<br>[0.37-1.73]                |
| Frequently                                                       | 1.08<br>[0.37-3.16]                | 0.99<br>[0.55-1.79]                | 0.74<br>[0.23-2.33]                | 1.09<br>[0.31-3.78]                 | 0.98<br>[0.42-2.25]                | 0.55<br>[0.19-1.58]                | 0.61<br>[0.31-1.21]                | 1.00<br>[0.65-1.55]                | 0.85<br>[0.22-3.28]                | 1.28<br>[0.66-2.49]                | 0.53<br>[0.25-1.13]                |
| <b>Home care contacts - ref Never</b>                            |                                    |                                    |                                    |                                     |                                    |                                    |                                    |                                    |                                    |                                    |                                    |
| Occasionally                                                     | 0.93<br>[0.34-2.54]                | 0.98<br>[0.59-1.62]                | 0.87<br>[0.29-2.61]                | 2.27<br>[0.71-7.21]                 | 1.18<br>[0.23-6.09]                | 0.88<br>[0.33-2.34]                | 0.22<br>[0.10-0.47]                | 1.12<br>[0.61-2.06]                | 6.99<br>[0.37-13.3]                | 0.80<br>[0.35-1.81]                | 1.47<br>[0.55-3.94]                |
| Frequently                                                       | 0.94<br>[0.31-2.82]                | 1.01<br>[0.56-1.80]                | 0.82<br>[0.23-2.87]                | 1.17<br>[0.48-6.16]                 | 1.13<br>[1.19-6.77]                | 0.91<br>[0.30-2.72]                | 0.20<br>[0.09-0.43]                | 1.18<br>[0.64-2.19]                | 7.78<br>[0.41-14.7]                | 0.59<br>[0.25-1.40]                | 1.33<br>[0.49-3.62]                |
| <b>Working with Case Manager –ref No</b>                         |                                    |                                    |                                    |                                     |                                    |                                    |                                    |                                    |                                    |                                    |                                    |
| Yes, outside practice                                            | 0.89<br>[0.39-2.06]                | 0.85<br>[0.61-1.18]                | 0.98<br>[0.19-5.01]                | 1.18<br>[0.52-2.67]                 | 1.20<br>[0.57-2.52]                | 4.74<br>[1.60-14.06]               | 1.03<br>[0.71-1.52]                | 0.88<br>[0.61-1.27]                | 1.64<br>[1.18-2.26]                | 1.21<br>[0.41-3.52]                | 0.99<br>[0.64-1.53]                |
| Yes, in practice                                                 | 1.04<br>[0.59-1.81]                | 0.83<br>[0.62-1.11]                | 0.89<br>[0.15-5.14]                | 1.68<br>[0.94-3.00]                 | 0.58<br>[0.33-1.01]                | 1.80<br>[0.78-4.19]                | 0.94<br>[0.63-1.40]                | 0.82<br>[0.63-1.06]                | 1.06<br>[0.58-1.94]                | 1.03<br>[0.42-2.50]                | 0.59<br>[0.40-0.86]                |
| <b>Information on changes in patient health – ref Never</b>      |                                    |                                    |                                    |                                     |                                    |                                    |                                    |                                    |                                    |                                    |                                    |
| Occasionally                                                     | 1.43<br>[0.44-4.70]                | 0.98<br>[0.57-1.69]                | 1.24<br>[0.43-3.60]                | 1.10<br>[0.17-7.12]                 | 0.54<br>[0.18-1.61]                | 0.26<br>[0.06-1.09]                | 1.00<br>[0.27-3.80]                | 1.05<br>[0.55-2.03]                | 0.01<br>[0.01-0.71]                | 2.46<br>[1.03-5.87]                | 1.34<br>[0.58-3.10]                |
| Frequently                                                       | 1.15<br>[0.34-3.90]                | 0.69<br>[0.39-1.22]                | 1.65<br>[0.49-5.50]                | 0.95<br>[0.14-6.31]                 | 0.56<br>[0.18-1.80]                | 0.31<br>[0.07-1.33]                | 0.70<br>[0.18-2.71]                | 0.83<br>[0.43-1.62]                | 0.01<br>[0.01-0.56]                | 0.41<br>[0.17-0.97]                | 1.64<br>[0.68-3.96]                |
| <b>Delayed discharge –ref &gt; 2days</b>                         |                                    |                                    |                                    |                                     |                                    |                                    |                                    |                                    |                                    |                                    |                                    |
| 2 days-2 weeks                                                   | 1.11<br>[0.72-1.71]                | 1.25<br>[0.95-1.63]                | 0.91<br>[0.46-1.77]                | 1.11<br>[0.63-1.96]                 | 0.61<br>[0.39-0.96]                | 1.18<br>[0.75-1.85]                | 0.94<br>[0.63-1.38]                | 1.03<br>[0.82-1.29]                | 1.64<br>[1.21-2.23]                | 1.27<br>[0.90-1.80]                | 1.48<br>[1.05-2.08]                |
| 3-4 weeks                                                        | 0.94<br>[0.34-2.62]                | 1.42<br>[0.95-2.11]                | 1.34<br>[0.54-3.30]                | 2.45<br>[0.56-10.70]                | 0.47<br>[0.22-1.01]                | 10.36<br>[1.31-81.79]              | 1.60<br>[0.73-3.49]                | 1.31<br>[0.89-1.92]                | 1.96<br>[1.02-3.78]                | 2.20<br>[1.17-4.12]                | 2.12<br>[0.98-4.58]                |

|                                                           |                      |                     |                     |                       |                     |                      |                         |                     |                     |                     |                     |
|-----------------------------------------------------------|----------------------|---------------------|---------------------|-----------------------|---------------------|----------------------|-------------------------|---------------------|---------------------|---------------------|---------------------|
| > 1 month /never                                          | 3.50<br>[1.19-10.27] | 1.41<br>[0.86-2.29] | 1.41<br>[0.52-3.78] | 17.81<br>[3.98-79.60] | 0.43<br>[0.12-1.47] | -                    | 20.32 [0.65-<br>636.14] | 1.61<br>[0.98-2.65] | 1.72<br>[0.57-5.14] | 1.27<br>[0.38-4.19] | 3.09<br>[1.39-6.87] |
| <b>Involved in coordinated care with hospitals-ref No</b> |                      |                     |                     |                       |                     |                      |                         |                     |                     |                     |                     |
| Yes                                                       | 0.95<br>[0.55-1.63]  | 0.95<br>[0.67-1.34] | 1.84<br>[0.78-4.36] | 1.70<br>[0.57-5.13]   | 0.97<br>[0.43-2.23] | 1.13<br>[0.58-2.22]  | 0.87<br>[0.58-1.31]     | 0.88<br>[0.70-1.11] | 0.75<br>[0.45-1.25] | 0.71<br>[0.38-1.32] | 0.92<br>[0.47-1.82] |
| <b>Electronic Health Record - ref No</b>                  |                      |                     |                     |                       |                     |                      |                         |                     |                     |                     |                     |
| Yes                                                       | 1.21<br>[0.56-2.61]  | 0.73<br>[0.52-1.02] | 0.73<br>[0.36-1.48] | 0.75<br>[0.40-1.39]   | 0.77<br>[0.34-1.51] | 0.90<br>[0.18-4.40]  | -                       | 0.97<br>[0.31-3.05] | 0.62<br>[0.43-0.87] | 0.63<br>[0.18-2.17] | 0.96<br>[0.50-1.85] |
| <b>Drug alerts –ref No</b>                                |                      |                     |                     |                       |                     |                      |                         |                     |                     |                     |                     |
| Occasionally                                              | 0.83<br>[0.19-3.64]  | 1.54<br>[1.07-2.23] | 0.44<br>[0.20-0.98] | 1.23<br>[0.70-2.16]   | 1.49<br>[0.29-7.62] | 2.08<br>[0.25-17.18] | 0.69<br>[0.33-1.45]     | 0.99<br>[0.63-1.54] | 1.48<br>[1.02-2.14] | 2.66<br>[1.11-6.35] | 1.21<br>[0.52-2.79] |
| Frequently                                                | 0.51<br>[0.16-1.64]  | 1.36<br>[0.99-1.87] | 1.04<br>[0.50-2.14] | 1.91<br>[1.07-3.41]   | 1.83<br>[0.51-6.60] | 0.86<br>[0.15-4.82]  | 0.48<br>[0.28-0.84]     | 0.70<br>[0.50-0.99] | 1.55<br>[1.06-2.27] | 1.54<br>[0.72-3.29] | 1.17<br>[0.63-2.16] |

AU = Australia; CA = Canada; CH = Switzerland; DE = Germany; FR = France; NL = Netherlands; NO = Norway; NZ = New Zealand; SE = Sweden; UK = United Kingdom; US = United States.

**FTE:** GPs Full-time equivalent in the practice. Urbanity was self-reported.

For each country, the multivariate model includes all the same independent variables listed in the Table.
